# Supplementary material
Source: publisher figshare collection journal article supplement (https://karger.figshare.com/ndownloader/files/29644839)
Supplement: Supplementary file 1 [file 29644839]

**Supplementary Table 1.** The sites of early extrahepatic recurrence in patients with poorly and well- or moderately differentiated hepatocellular carcinoma.

| **Site of recurrence** | **Poorly differentiated**  **(n = 30) (%)** | **Well- or moderately differentiated (n = 34) (%)** |
| --- | --- | --- |
| **Bone** | 10** (33.3) | 12 (35.3) |
| **Lung** | 11* (36.7) | 8* (23.5) |
| **Peritoneum** | 4 (13.3) | 11 (32.4) |
| **Lymph node** | 3* (10) | 3 (8.8) |
| **Adrenal gland** | 2 (6.7) | 1* (2.9) |
| **Brain** | 2 (6.7) | 0 (0) |

*Site of duplicate recurrence in one patient.

**Site of duplicate recurrence in two patients.
